# Supplementary material for: A defective MOF architecture threaded by interlaced carbon nanotubes for high-cycling lithium–sulfur batteries
Source: Royal Society of Chemistry journal article supplement (doi:10.1039/c8ra02254b), 2018-01-01
Supplement: c8ra02254b1.pdf [file c8ra02254b1.pdf]

## Electronic Supporting Information

### Defective MOF Architecture Threaded by Interlaced Carbon Nanotubes for High-Cycling Lithium-Sulfur Batteries

Yujie Pu<sup>a,b</sup>, Wubin Wu<sup>a</sup>, Jianyu Liu<sup>a,b</sup>, Tao Liu<sup>a,b</sup>, Fei Ding<sup>b,\*</sup>, Jing Zhang<sup>b</sup> and Zhiyuan Tang<sup>a,\*</sup>

- a. Department of Applied Chemistry, School of Chemical Engineering and Technology, Tianjin University, Tianjin, 300072, PR China
- b. National Key Laboratory of Science and Technology on Power Sources, Tianjin Institute of Power Sources, Tianjin, 300384, PR China
- c. Tianjin Key Laboratory of Applied Catalysis Science and Technology, School of Chemical Engineering and Technology, Tianjin University, Tianjin 300354, PR China.

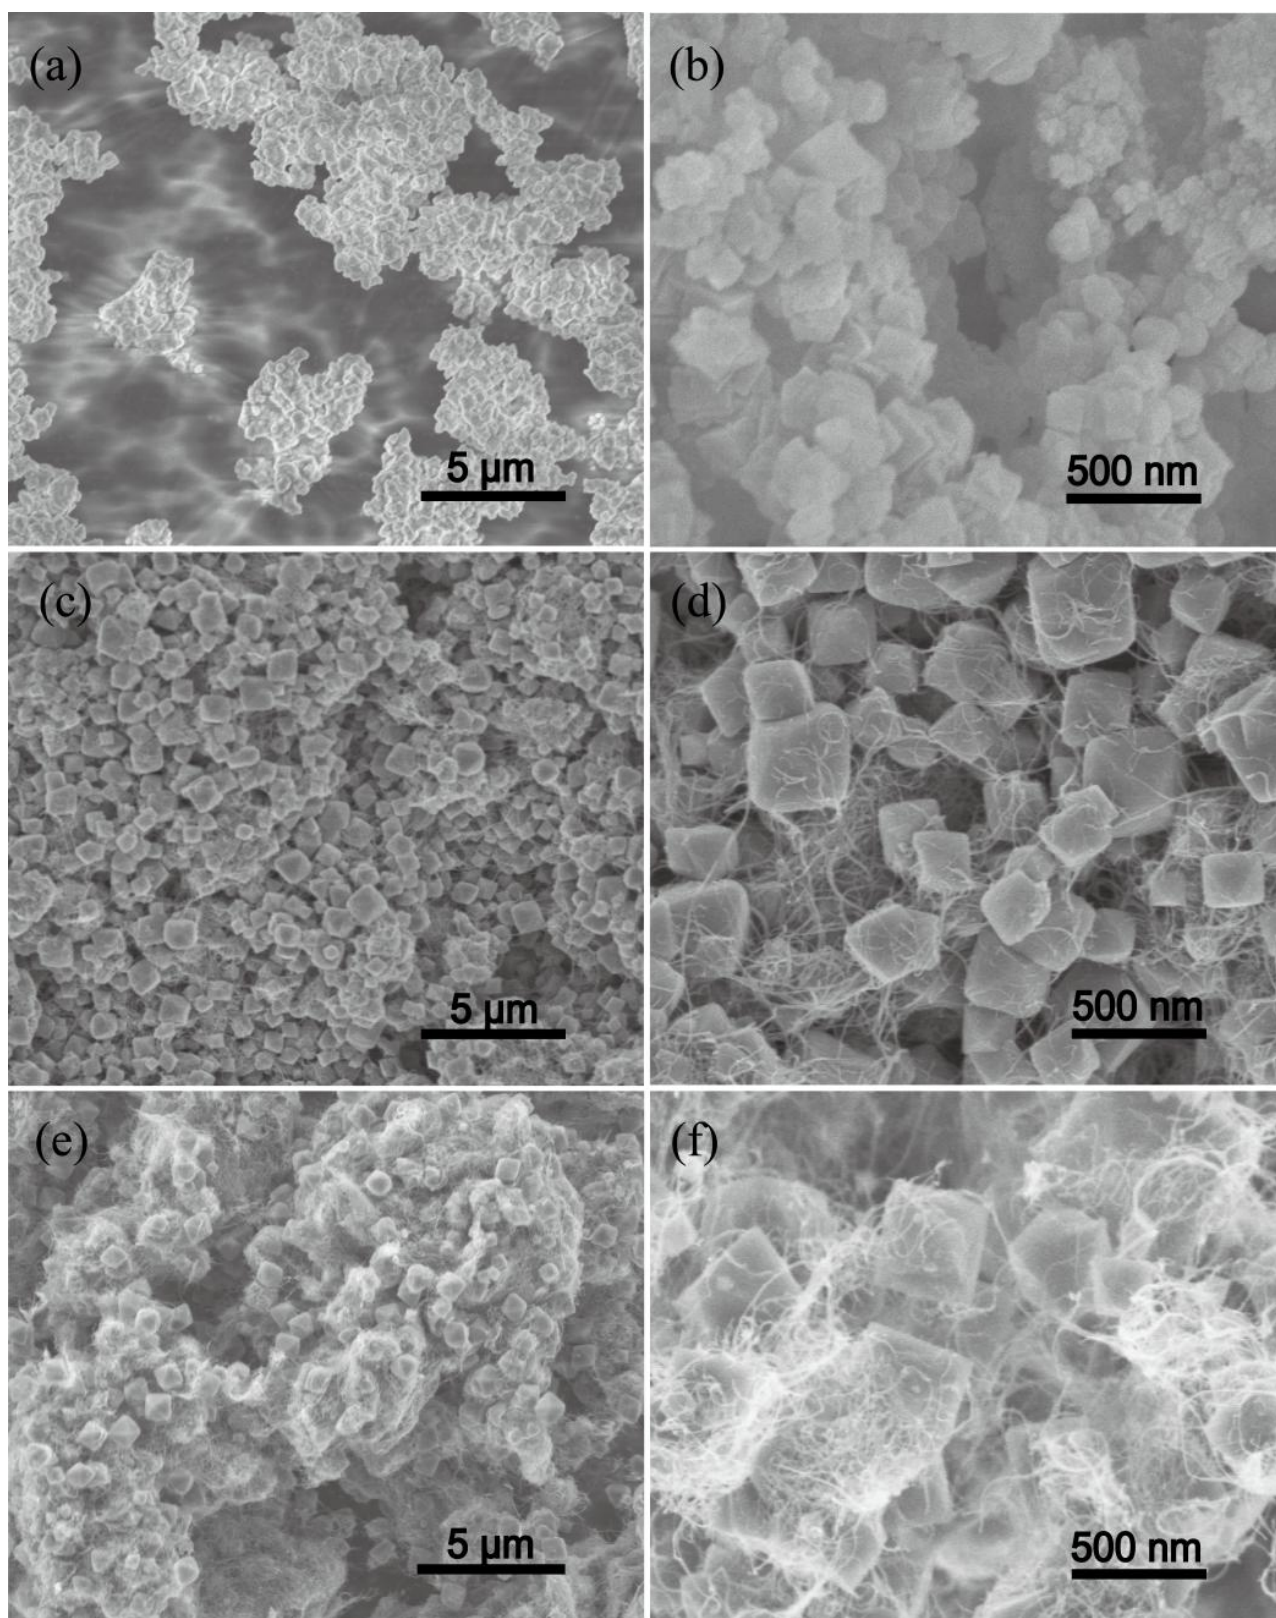

**Fig. S 1** SEM morphologies of (a) and (b) UiO-66, (c) and (d) UC-2, (e) and (f) UC-5

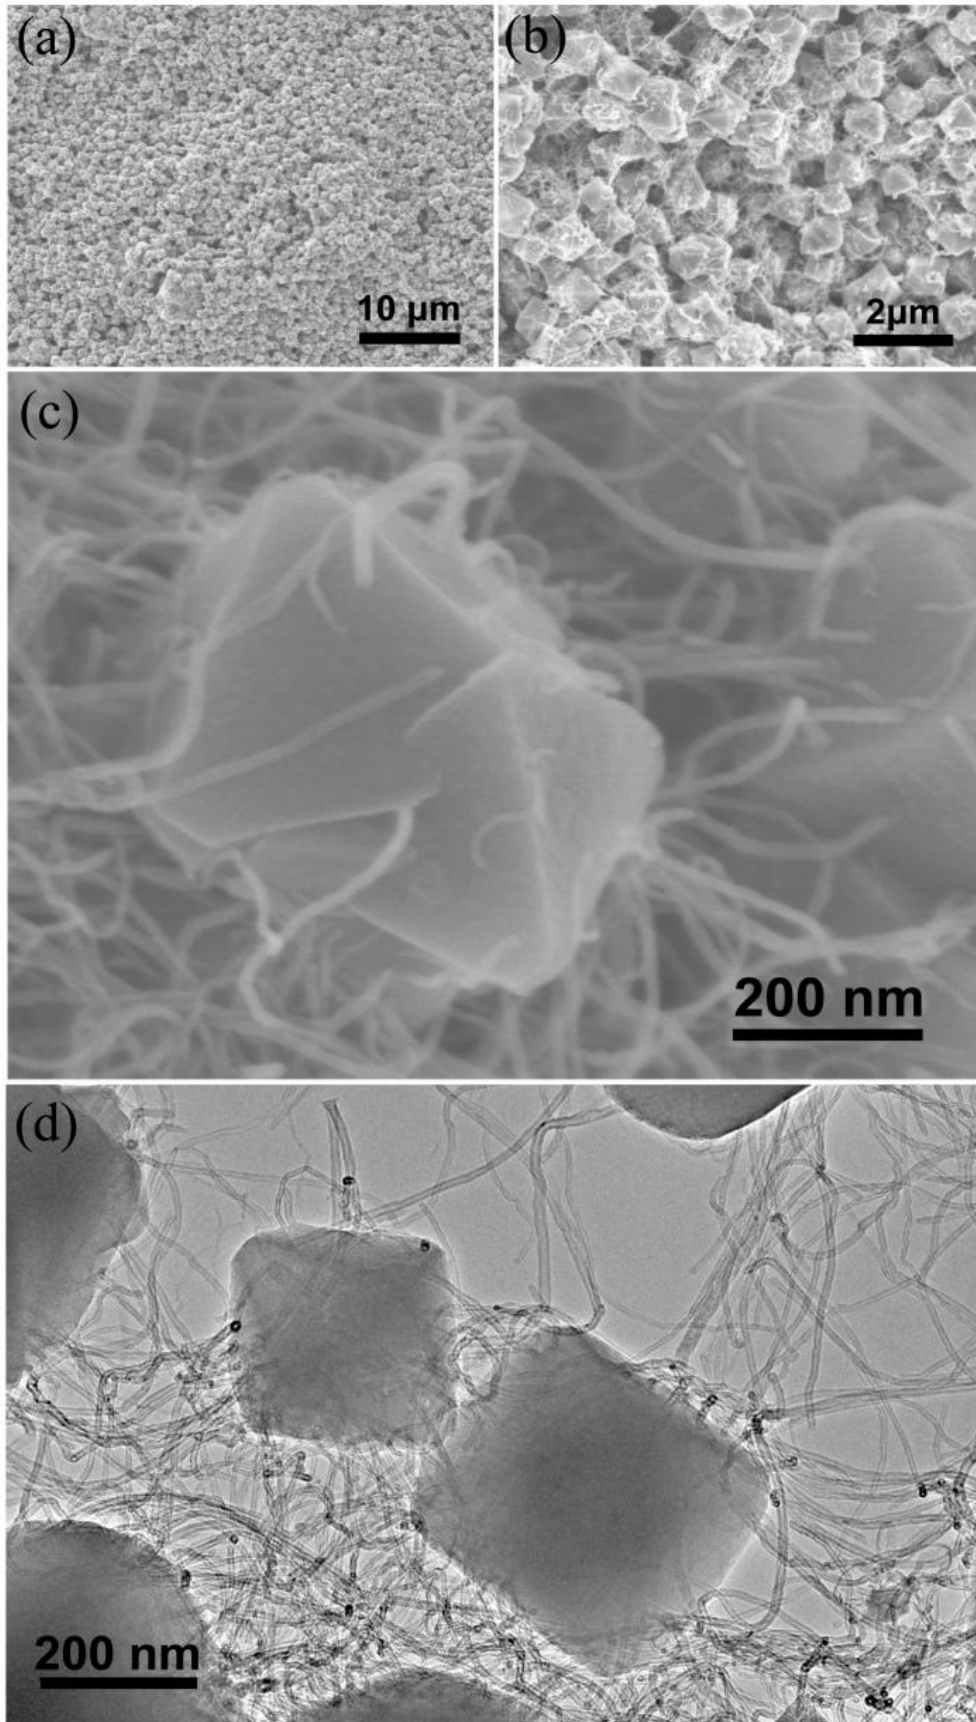

**Fig. S 2** (a)-(c) SEM and (d) TEM photographs of UC-3 composite.

**Table S 1** BET characteristics of CNTs, Uio-66, UC series and S@UC hybrid series and their pore volume and average pore diameters (except CNTs) derived from their 77K N<sub>2</sub> isotherms based on the nonlocal density function theory (NLDFT).

| Samples | $S_{\text{BET}} / (\text{m}^2 \cdot \text{g}^{-1})$ | $V_{\text{total}} / (\text{cm}^3 \cdot \text{g}^{-1})$ | $D_{\text{average}} / (\text{nm})$ |
|---------|-----------------------------------------------------|--------------------------------------------------------|------------------------------------|
| CNTs    | 278                                                 | 0.72                                                   | 12.3                               |
| Uio-66  | 1157                                                | 0.43                                                   | 1.08                               |
| UC-2    | 976                                                 | 0.47                                                   | 1.33                               |
| UC-3    | 863                                                 | 0.56                                                   | 1.59                               |
| UC-5    | 738                                                 | 0.53                                                   | 1.64                               |
| -----   |                                                     |                                                        |                                    |
| S@UC-2  | 17.13                                               | 0.058                                                  | 1.77                               |
| S@UC-3  | 15.36                                               | 0.031                                                  | 1.85                               |
| S@UC-5  | 6.62                                                | 0.012                                                  | 4.54                               |

(Note that all data of CNTs are obtained from its BET characteristics)

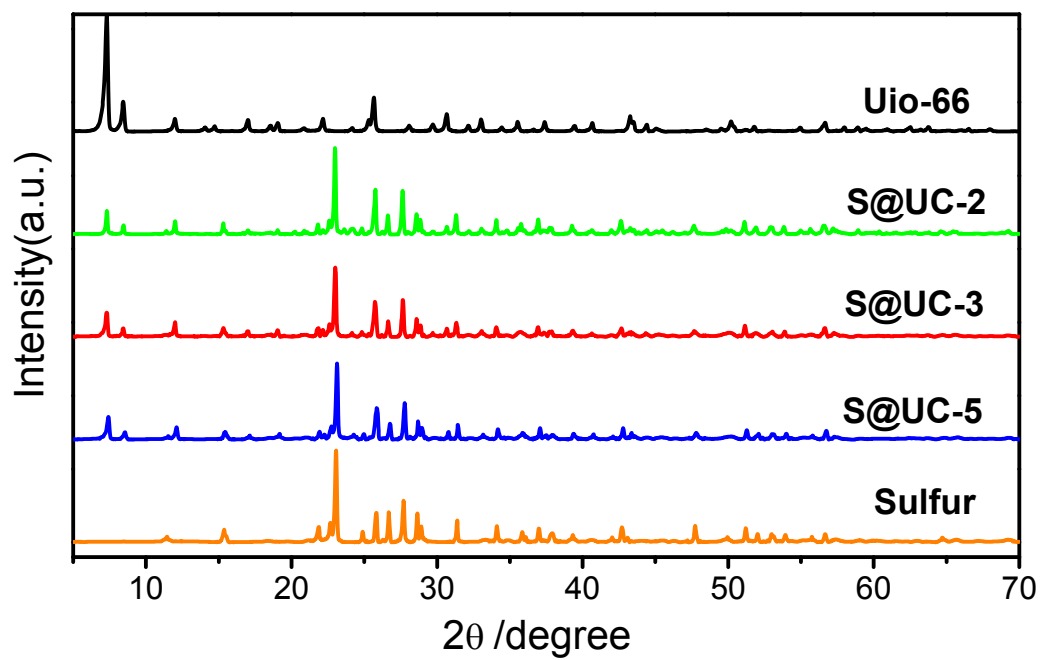

**Fig. S 3** XRD patterns of Uio-66, S@UC series and sulfur.

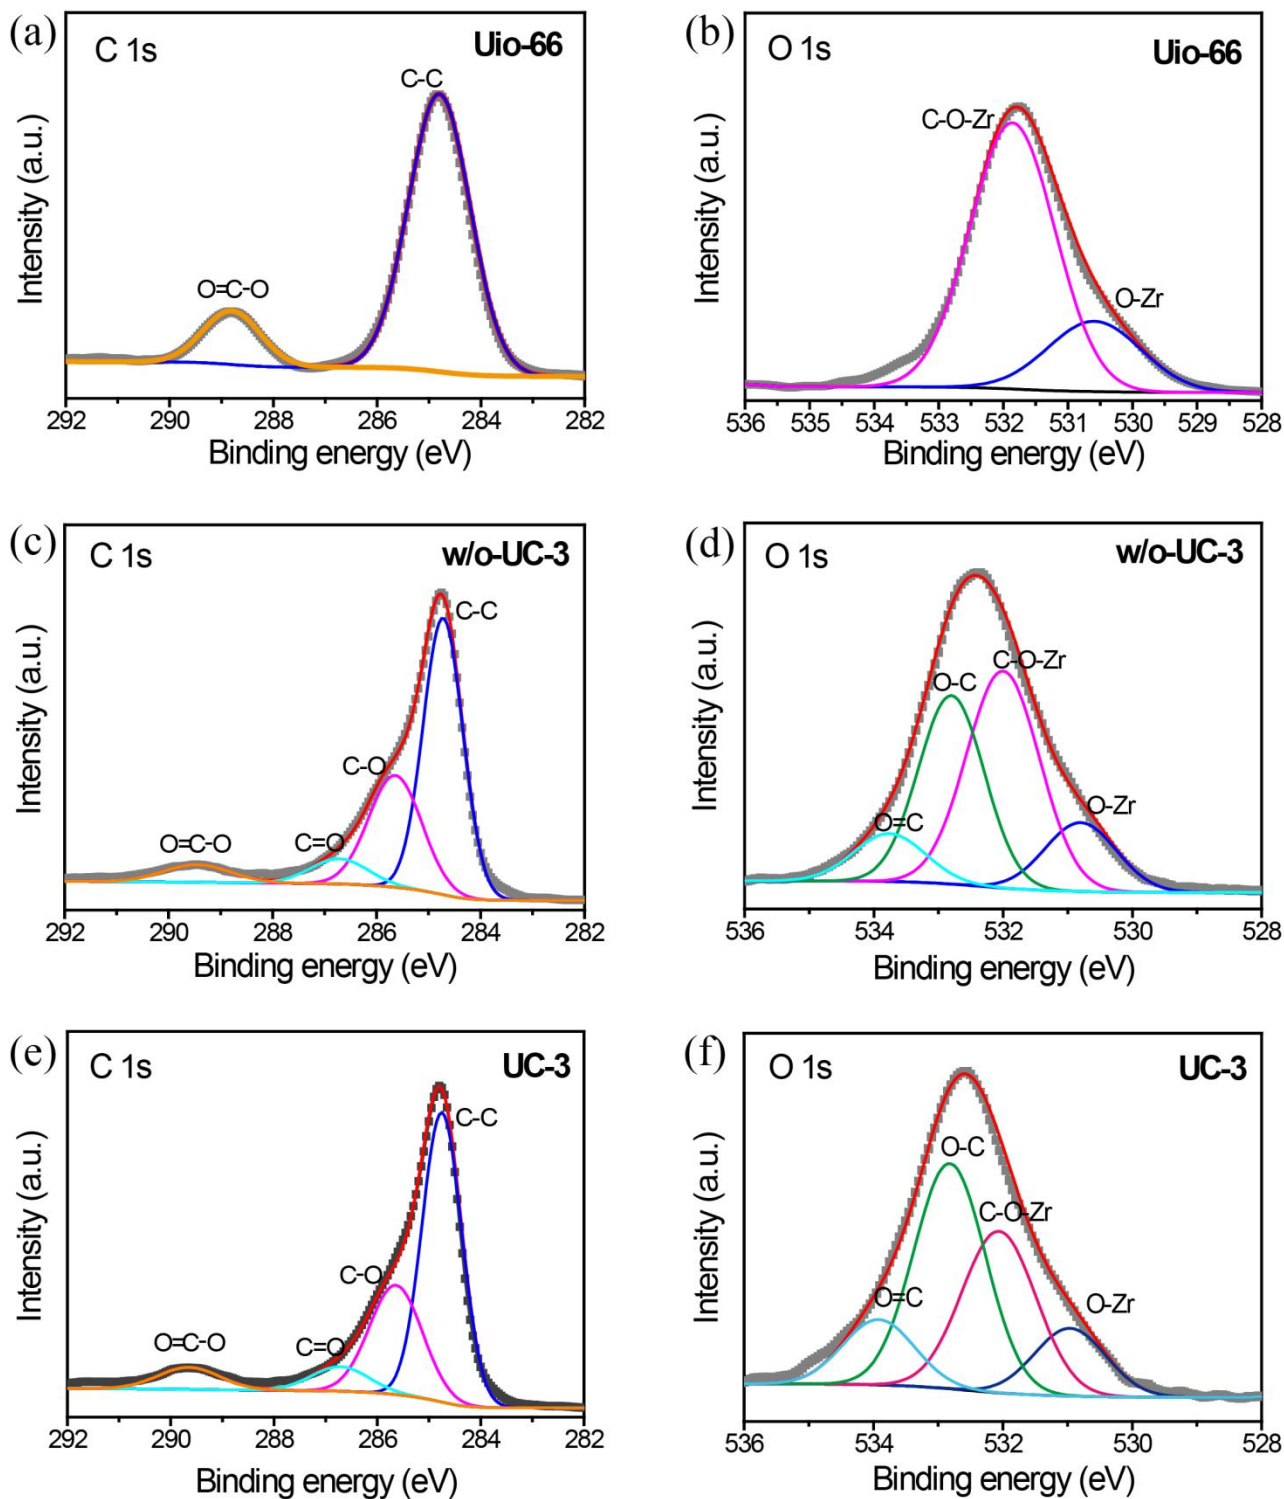

**Fig. S 4** C 1s and O 1s XPS spectra of (a) and (b) Uio-66, (c) and (d) w/o-UC-3 and (e) and (f) S@UC-3, respectively.

**Table S 2** Data obtained from the quantitative analysis for C 1s and O 1s spectra of w/o-UC-3 and UC-3.

| Spectrum | Bond   | Binding energy (eV) |        | Content (%) |        |
|----------|--------|---------------------|--------|-------------|--------|
|          |        | w/o-UC-3            | UC-3   | w/o-UC-3    | UC-3   |
| C 1s     | C-C    | 287.74              | 284.75 | 68.27%      | 67.37% |
|          | C-O    | 285.62              | 285.64 | 19.01%      | 18.61% |
|          | C=O    | 286.74              | 286.72 | 4.81%       | 4.78%  |
|          | O=C-O  | 289.46              | 289.64 | 7.91%       | 9.24%  |
| O 1s     | O-Zr   | 530.8               | 530.96 | 7.68%       | 7.93%  |
|          | Zr-O-C | 532                 | 532.06 | 29.09%      | 24.49% |
|          | O-C    | 532.8               | 532.82 | 57.00%      | 58.34% |
|          | O=C    | 533.76              | 533.92 | 6.24%       | 9.24%  |

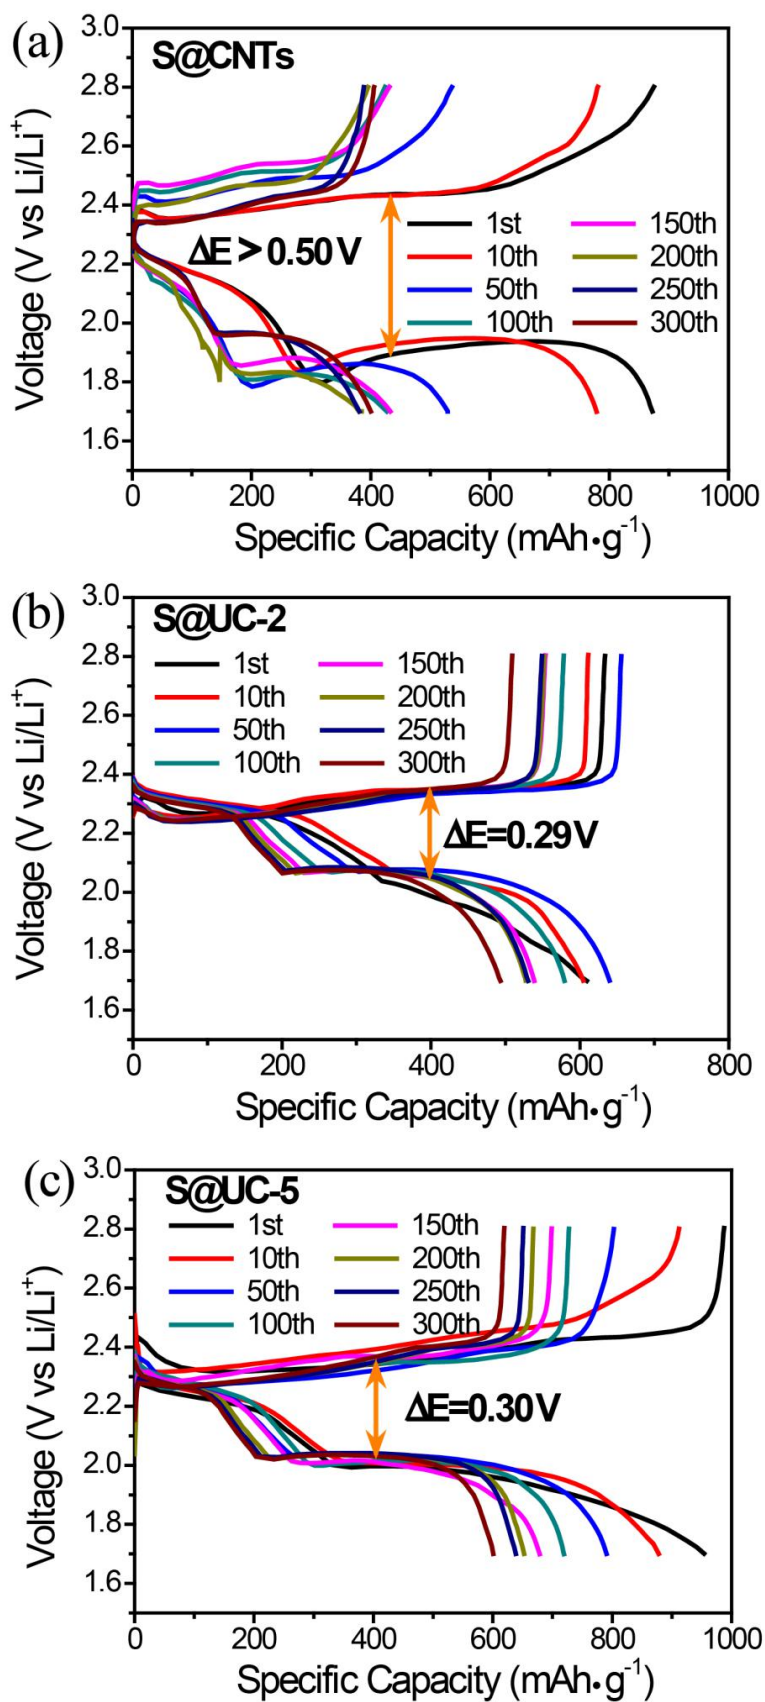

**Fig. S 5** Galvanostatic charge-discharge profiles of (a) S@CNTs, (b) S@UC-2 and (c) S@UC-5 as the electrode at  $0.5\text{ A}\cdot\text{g}^{-1}$



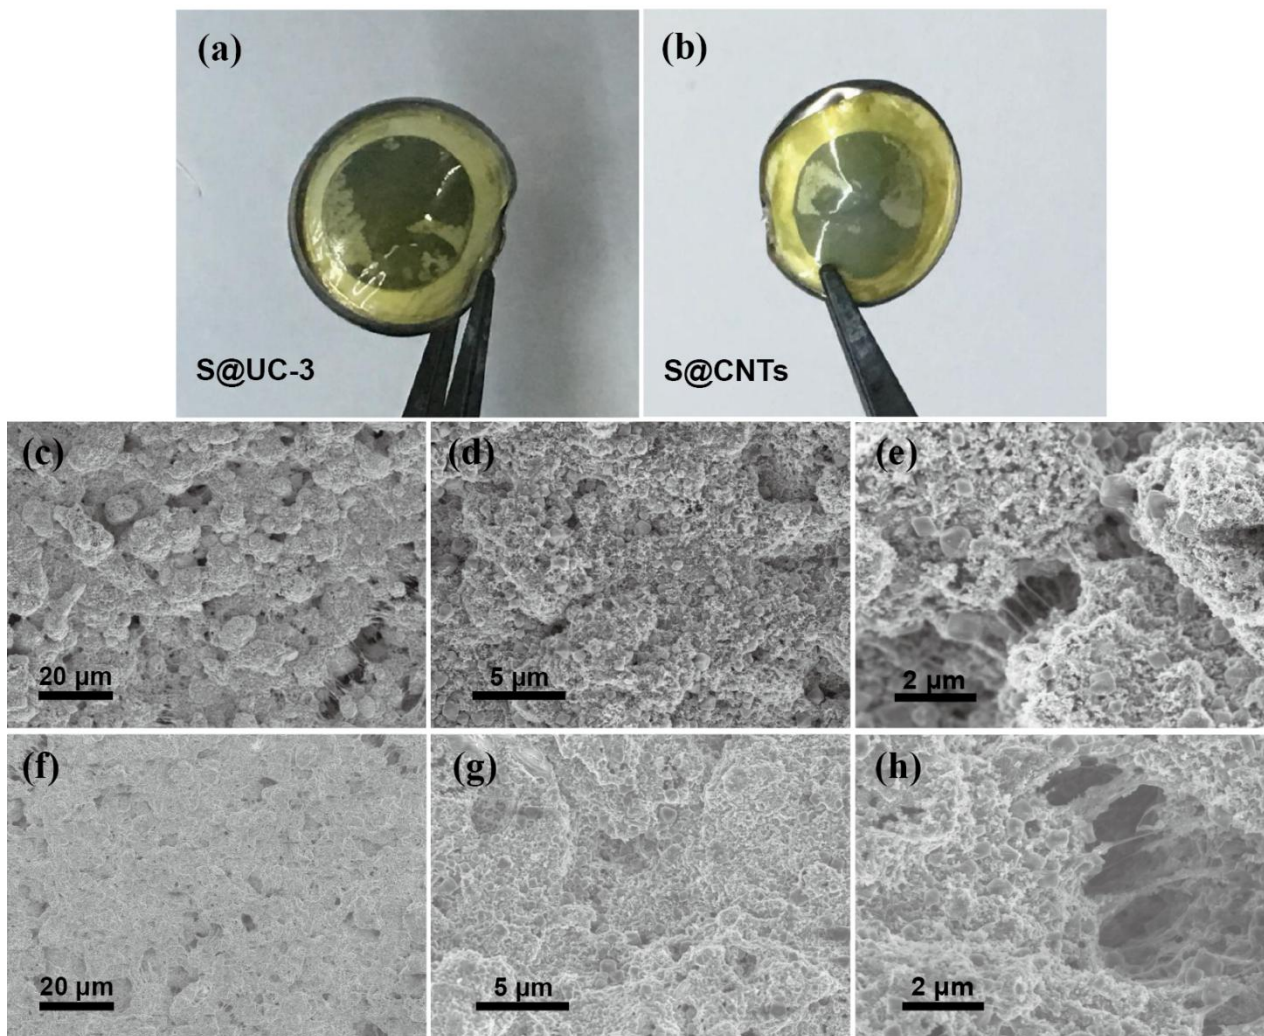

**Fig. S 6** The disassemble cell pictures of (a) S@UC-3 electrode and (b) S@CNTs electrode after 300 cycles, conducted and obtained in the Ar gas filled glove box ( $O_2$ ,  $H_2O < 0.1$  ppm) . The SEM images of (c)-(e) fresh and (f)-(h) cycled S@UC-3 electrode after 300 cycles cleaned by the DOL/DME (1:1) solvent.

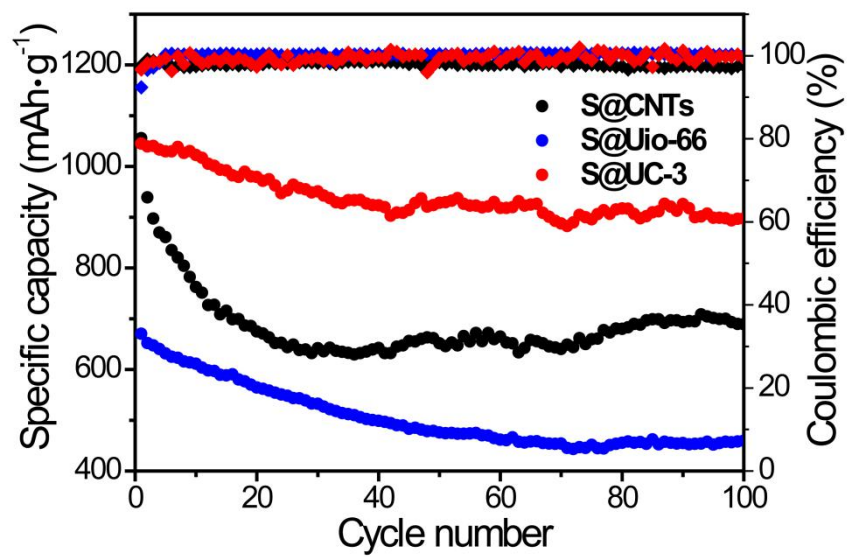

**Fig. S 7** Cycling performance of the S@CNTs, S@Uio-66 and S@UC-3 electrodes at the current density of  $0.1 \text{ A}\cdot\text{g}^{-1}$ .

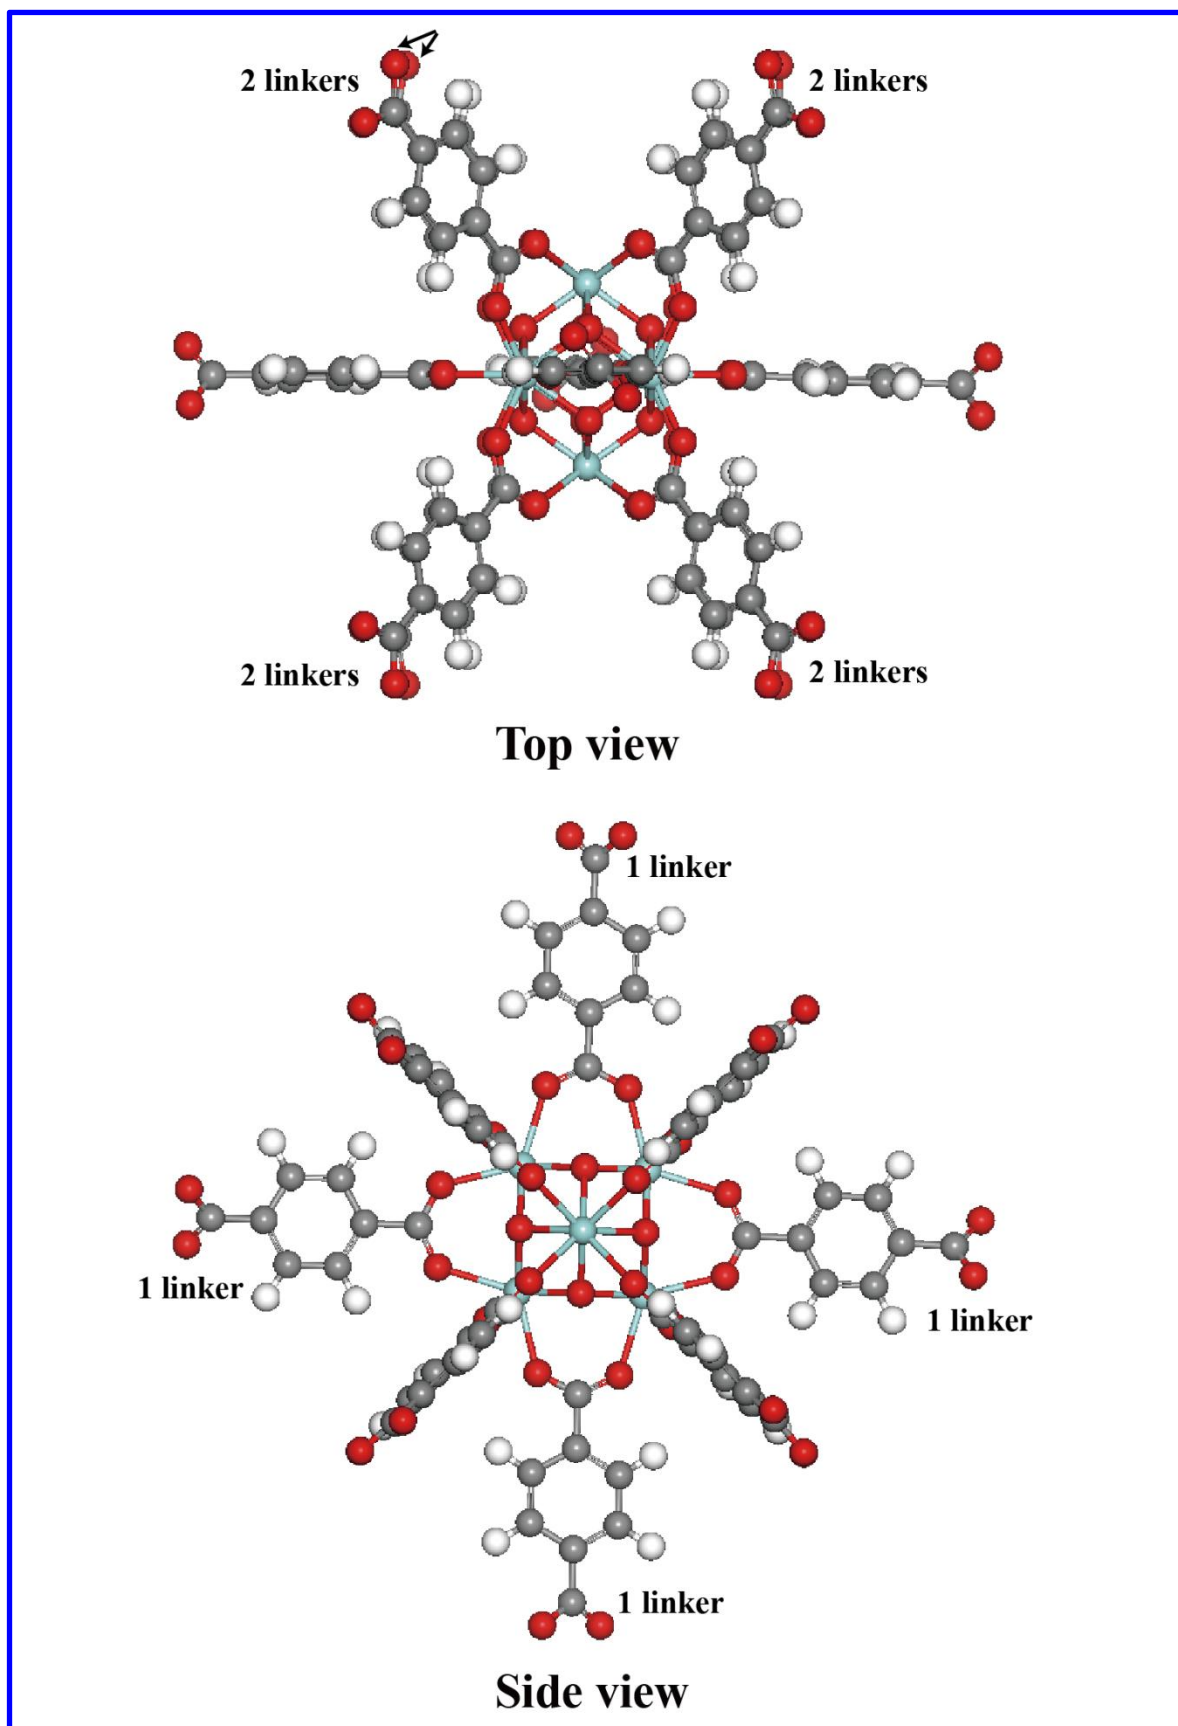

**Fig. S 8** Atomic unit model configurations of the intact UiO-66 (top view and side view)

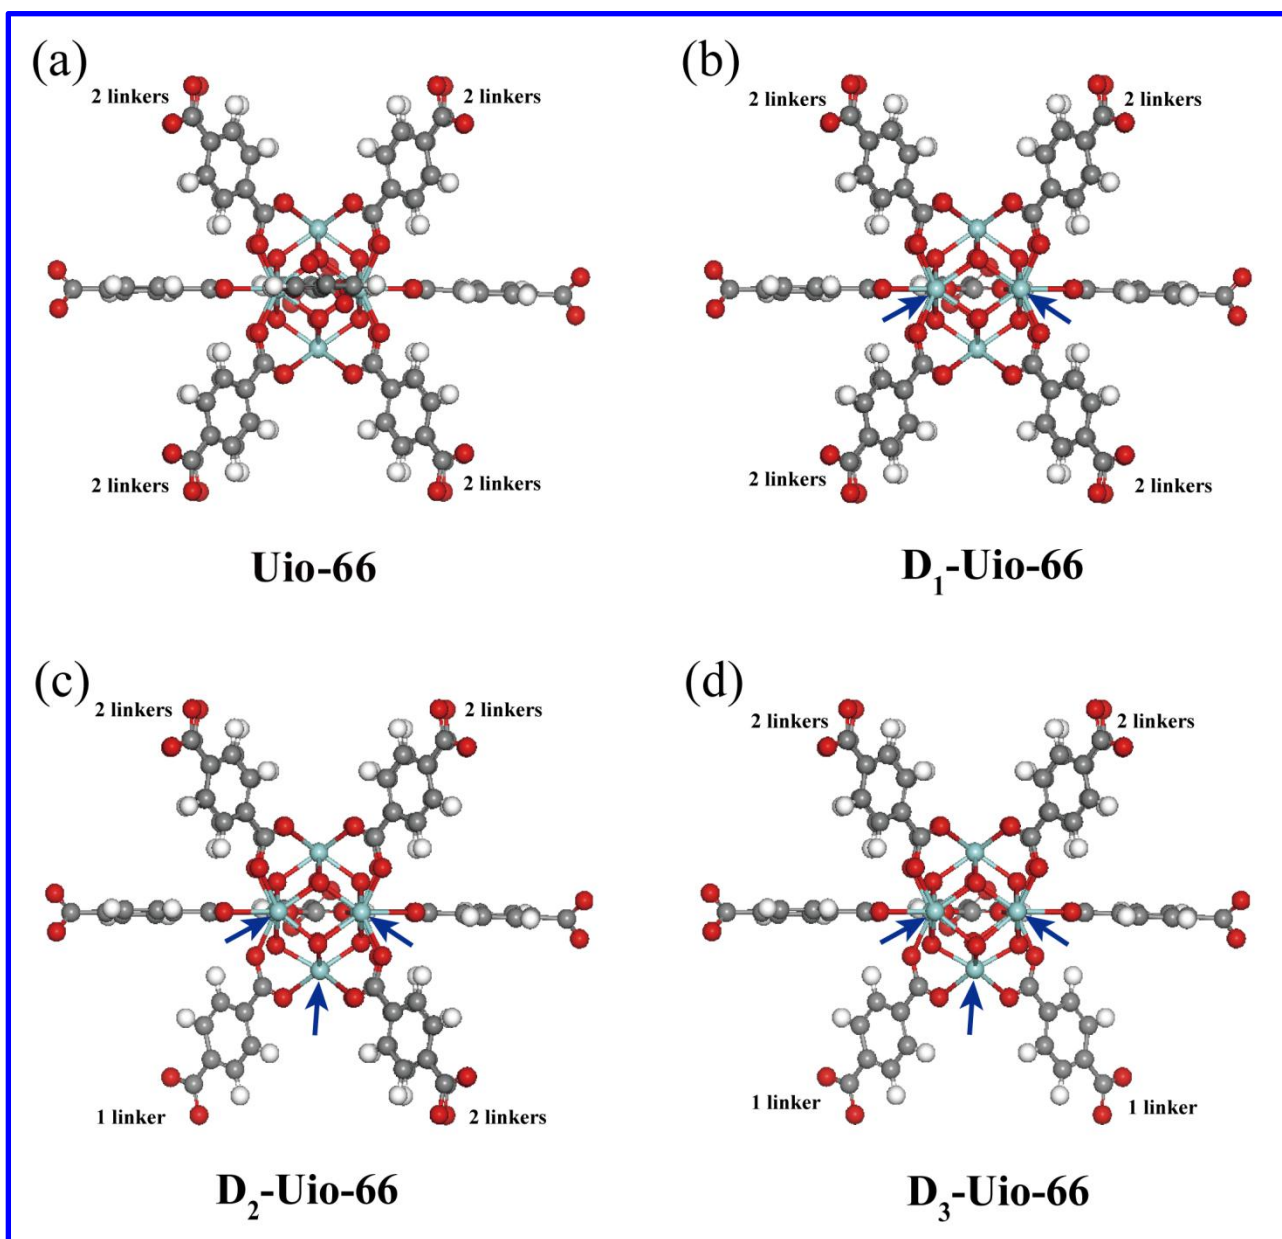

**Fig. S 9** Atomic unit model configurations of (a) intact UiO-66 and (b)-(d) defective UiO-66 with one, two and three linker loss (denoted as D<sub>1</sub>-UiO-66, D<sub>2</sub>-UiO-66 and D<sub>3</sub>-UiO-66). Gray, red, white and light blue spheres represent C, O, H and Zr atoms, respectively.

**Table S 3** Performance comparisons of the representative MOFs-based sulfur electrodes (1C=1675 mA·g<sup>-1</sup>).

| Cathode          | Sulfur content in the electrode | Potential range(V) | Maximum capacity (mAh·g <sup>-1</sup> ) | Average fading Rate | Discharge current density (Cycle number) | Ref.             |
|------------------|---------------------------------|--------------------|-----------------------------------------|---------------------|------------------------------------------|------------------|
| <b>S@UC-3</b>    | <b>~54%</b>                     | <b>1.7-2.8</b>     | <b>1045</b>                             | <b>0.142%</b>       | <b>100 mA·g<sup>-1</sup> (100)</b>       | <b>This work</b> |
|                  |                                 |                    | <b>925</b>                              | <b>0.055%</b>       | <b>500 mA·g<sup>-1</sup> (300)</b>       |                  |
|                  |                                 |                    | <b>764</b>                              | <b>0.071%</b>       | <b>1000 mA·g<sup>-1</sup> (800)</b>      |                  |
| S@rGO/MIL100(Cr) | ~ 41 %                          | 1.0-3.0            | 869                                     | 0.200 %             | 0.1C (100)                               | 1                |
| S@ZIF-8          | ~ 30 %                          | 1.8-2.8            | 793                                     | 0.101 %             | 0.5C (300)                               | 2                |
| S@Ni-MOF         | ~ 48 %                          | 1.5-3.0            | 689                                     | 0.094 %             | 0.2C (200)                               | 3                |
| S@MOF-525(Cu)    | ~ 42 %                          | 1.5-3.0            | 1200                                    | 0.207 %             | 0.2C (200)                               | 4                |
| S@rGO/MIL-100(V) | ~ 35 %                          | 1.6-3.0            | 849                                     | 0.170 %             | 0.1C (200)                               | 5                |
| S@HKUST-1/CNTs   | ~ 40 %                          | 1.7-2.8            | 1263                                    | 0.080 %             | 0.2C (500)                               | 6                |
| S@nMOF-867       | —                               | 1.7-2.8            | 907                                     | 0.050 %             | 835 mA·g <sup>-1</sup> (500)             | 7                |
| S@Cd-MOF         | ~ 50 %                          | 1.5-2.8            | 1092                                    | 0.537 %             | 0.1C (50)                                | 8                |

Note that average fading rate is calculated based on the formula:

$$\frac{(C_{\text{Max}} - C_{\text{Ret}}) / C_{\text{Max}}}{N} \times 100\%$$

C<sub>Max</sub> represents the maximum capacity, C<sub>Ret</sub> represents the capacity retention after cycling, N represents the cycling numbers.

**Table S 4** Cycling performance comparisons of UC-3 with several representative MOF-derived porous Carbon materials as the sulfur hosts for Li-S batteries

| MOFs   | Cathode                  | Sulfur content in the electrode | Potential range (V) | Maximum /Final Capacity (mAh·g <sup>-1</sup> ) | Discharge current density (Cycle number)                                  | Ref.             |
|--------|--------------------------|---------------------------------|---------------------|------------------------------------------------|---------------------------------------------------------------------------|------------------|
|        | <b>S@UC-3</b>            | <b>~ 54%</b>                    | <b>1.7-2.8</b>      | <b>925/765</b><br><b>764/486</b>               | <b>500 mA·g<sup>-1</sup> (300)</b><br><b>1000 mA·g<sup>-1</sup> (800)</b> | <b>This work</b> |
|        | GS-S/C <sub>ZIF8-D</sub> | ~ 38 %                          | 1.0-3.0             | 1171/561                                       | 168 mA·g <sup>-1</sup> (120)                                              | 9                |
|        | C-S-3                    | ~ 22 %                          | 1.0-3.0             | 1655/936                                       | 335 mA·g <sup>-1</sup> (100)                                              | 10               |
| ZIF-8  | S/N3-C                   | ~ 46 %                          | 1.0-3.0             | 1500/800                                       | 0.1C (100)                                                                | 11               |
|        | OCNTA/S                  | ~ 56 %                          | 1.7-2.6             | 1037/487                                       | 0.2C (1000)                                                               | 12               |
|        | S/ZIF-8-NS-C             | ~ 56 %                          | 1.7-2.8             | 887/587                                        | 0.5C (300)                                                                | 13               |
|        | RGO/C-Co-S               | ~ 50 %                          | 1.8-2.6             | 1218/949                                       | 300 mA·g <sup>-1</sup> (300)                                              | 14               |
| ZIF-67 | NC-800-S60               | ~ 45 %                          | 1.7-2.8             | 1124/511                                       | 800 mA·g <sup>-1</sup> (400)                                              | 15               |
|        | S@Co-N-GC                | ~ 49 %                          | 1.7-2.7             | 1440/850                                       | 0.2C (200)                                                                | 16               |
|        | MWCNT@Meso-C/S           | ~ 47 %                          | 1.5-3.0             | 1343/540                                       | 0.5C (50)                                                                 | 17               |
|        | MCP-950/S                | ~ 63 %                          | 1.8-2.8             | 1274/1041                                      | 0.2C (50)                                                                 | 18               |
| MOF-5  | MPCN-S                   | ~ 56 %                          | 1.7-2.8             | 1000/740                                       | 0.5C (200)                                                                | 19               |
|        | S-Zn-MOF                 | ~ 35 %                          | 1.7-2.6             | 1476/609                                       | 0.2C (200)                                                                | 20               |
|        | GO@Meso-C/S              | ~ 64 %                          | 1.8-2.7             | 1122/825                                       | 0.2C (100)                                                                | 21               |
| Al-MOF | S/FLHPC                  | ~ 46 %                          | 1.5-2.8             | 1100/751                                       | 0.5C (200)                                                                | 22               |

**Table S 5** Cycling stability comparisons of UC-3 with several representative polar materials as the sulfur host in Li-S batteries (1C=1675 mA·g<sup>-1</sup>).

| Polar host material            | Sulfur content in the electrode | Fading rate   | Discharge current density     | Cycle number | Ref.             |
|--------------------------------|---------------------------------|---------------|-------------------------------|--------------|------------------|
| <b>UC-3</b>                    | ~ <b>54 %</b>                   | <b>0.055%</b> | <b>500 mA·g<sup>-1</sup></b>  | <b>300</b>   | <b>This work</b> |
|                                |                                 | <b>0.071%</b> | <b>1000 mA·g<sup>-1</sup></b> | <b>800</b>   |                  |
| TiO <sub>2</sub>               | ~ 53 %                          | 0.033 %       | 0.5C                          | 1000         | 23               |
| Ti <sub>4</sub> O <sub>7</sub> | ~ 48 %                          | 0.060 %       | 2C                            | 400          | 24               |
| TiO                            | ~ 56 %                          | 0.082 %       | 0.5C                          | 500          | 25               |
| MnO <sub>2</sub>               | ~ 56 %                          | 0.028 %       | 0.5C                          | 1500         | 26               |
| VO <sub>2</sub>                | ~ 60 %                          | 0.058 %       | 0.5C                          | 1000         | 27               |
| Nb <sub>2</sub> O <sub>5</sub> | ~ 48 %                          | 0.146 %       | 0.5C                          | 200          | 28               |
| TiN                            | ~ 50 %                          | 0.070 %       | 0.5C                          | 500          | 29               |
| VN                             | ~ 56 %                          | 0.094 %       | 1C                            | 200          | 30               |
| TiS <sub>2</sub>               | ~ 33% Li <sub>2</sub> S         | 0.058 %       | 0.5C                          | 400          | 31               |
| CoS <sub>2</sub>               | ~ 60 %                          | 0.034 %       | 2C                            | 2000         | 32               |
| Co <sub>3</sub> S <sub>4</sub> | ~ 53%                           | 0.080 %       | 1C                            | 450          | 33               |
| Co <sub>8</sub> S <sub>9</sub> | ~ 60 %                          | 0.045 %       | 0.5C                          | 1500         | 34               |
| WS <sub>2</sub>                | ~ 11 %                          | 0.031 %       | 0.5C                          | 500          | 35               |
| MXene                          | ~ 56 %                          | 0.050 %       | 0.5C                          | 650          | 36               |

## References:

1. Z. Zhao, S. Wang, R. Liang, Z. Li, Z. Shi and G. Chen, *J. Mater. Chem. A*, 2014, **2**, 13509-13512.
2. J. Zhou, R. Li, X. Fan, Y. Chen, R. Han, W. Li, J. Zheng, B. Wang and X. Li, *Energy Environ. Sci.*, 2014, **7**, 2715.
3. J. Zheng, J. Tian, D. Wu, M. Gu, W. Xu, C. Wang, F. Gao, M. H. Engelhard, J.-G. Zhang, J. Liu and J. Xiao, *Nano Lett.*, 2014, **14**, 2345-2352.
4. Z. Wang, B. Wang, Y. Yang, Y. Cui, Z. Wang, B. Chen and G. Qian, *ACS Appl. Mater. Interfaces*, 2015, **7**, 20999-21004.
5. Y. Hou, H. Mao and L. Xu, *Nano Research*, 2017, **10**, 344-353.
6. Y. Mao, G. Li, Y. Guo, Z. Li, C. Liang, X. Peng and Z. Lin, *Nat. Commun.*, 2017, **8**, 14628.
7. J. H. Park, K. M. Choi, D. K. Lee, B. C. Moon, S. R. Shin, M.-K. Song and J. K. Kang, *Sci. Rep-Uk*, 2016, **6**, 25555.
8. M.-T. Li, Y. Sun, K.-S. Zhao, Z. Wang, X.-L. Wang, Z.-M. Su and H.-M. Xie, *ACS Appl. Mater. Interfaces*, 2016, **8**, 33183-33188.
9. R. Chen, T. Zhao, T. Tian, S. Cao, P. R. Coxon, K. Xi, D. Fairen-Jimenez, R. Vasant Kumar and A. K. Cheetham, *APL Mater.*, 2014, **2**, 124109.
10. Z. Li and L. Yin, *ACS Appl. Mater. Interfaces*, 2015, **7**, 4029-4038.
11. X. Li, Q. Sun, J. Liu, B. Xiao, R. Li and X. Sun, *J. Power Sources*, 2016, **302**, 174-179.
12. P. Zuo, H. Zhang, M. He, Q. Li, Y. Ma, C. Du, X. Cheng, H. Huo, Y. Gao and G. Yin, *Carbon*, 2017, **122**, 635-642.
13. Y. Jiang, H. Liu, X. Tan, L. Guo, J. Zhang, S. Liu, Y. Guo, J. Zhang, H. Wang and W. Chu,



*ACS Appl. Mater. Interfaces*, 2017, **9**, 25239-25249.

14. Z. Li, C. Li, X. Ge, J. Ma, Z. Zhang, Q. Li, C. Wang and L. Yin, *Nano Energy*, 2016, **23**, 15-26.
15. J. Zhang, M. Huang, B. Xi, K. Mi, A. Yuan and S. Xiong, *Adv. Energy Mater.*, **7**, 1701330-n/a.
16. Y.-J. Li, J.-M. Fan, M.-S. Zheng and Q.-F. Dong, *Energy Environ. Sci.*, 2016, **9**, 1998-2004.
17. W. Bao, Z. Zhang, C. Zhou, Y. Lai and J. Li, *J. Power Sources*, 2014, **248**, 570-576.
18. S. Cai, X. Wang, M. Chen, J. Liu, Q. Lu and S. Wei, *J. Electrochem. Soc.*, 2016, **163**, A2922-A2929.
19. X. Qian, L. Jin, S. Wang, S. Yao, D. Rao, X. Shen, X. Xi and J. Xiang, *RSC Adv.*, 2016, **6**, 94629-94635.
20. P. M. Shanthi, P. J. Hanumantha, B. Gattu, M. Sweeney, M. K. Datta and P. N. Kumta, *Electrochim. Acta*, 2017, **229**, 208-218.
21. W. Bao, Z. Zhang, W. Chen, C. Zhou, Y. Lai and J. Li, *Electrochim. Acta*, 2014, **127**, 342-348.
22. X. Yang, N. Yan, W. Zhou, H. Zhang, X. Li and H. Zhang, *J. Mater. Chem. A*, 2015, **3**, 15314-15323.
23. Z. Wei Seh, W. Li, J. J. Cha, G. Zheng, Y. Yang, M. T. McDowell, P.-C. Hsu and Y. Cui, *Nat. Commun.*, 2013, **4**, 1331.
24. Q. Pang, D. Kundu, M. Cuisinier and L. F. Nazar, *Nat. Commun.*, 2014, **5**, 4759.
25. Z. Li, J. Zhang, B. Guan, D. Wang, L. M. Liu and X. W. Lou, *Nat. Commun.*, 2016, **7**, 13065.
26. X. Wang, G. Li, J. Li, Y. Zhang, A. Wook, A. Yu and Z. Chen, *Energy Environ. Sci.*, 2016, **9**,

2533-2538.

27. X. Liang, C. Y. Kwok, F. Lodi-Marzano, Q. Pang, M. Cuisinier, H. Huang, C. J. Hart, D. Houtarde, K. Kaup, H. Sommer, T. Brezesinski, J. Janek and L. F. Nazar, *Adv. Energy Mater.*, 2016, **6**, 1501636-n/a.
28. Y. Tao, Y. Wei, Y. Liu, J. Wang, W. Qiao, L. Ling and D. Long, *Energy Environ. Sci.*, 2016, **9**, 3230-3239.
29. Z. Cui, C. Zu, W. Zhou, A. Manthiram and J. B. Goodenough, *Adv. Mater.*, 2016, **28**, 6926-6931.
30. Z. Sun, J. Zhang, L. Yin, G. Hu, R. Fang, H.-M. Cheng and F. Li, *Nat. Commun.*, 2017, **8**, 14627.
31. Z. W. Seh, J. H. Yu, W. Li, P.-C. Hsu, H. Wang, Y. Sun, H. Yao, Q. Zhang and Y. Cui, *Nat. Commun.*, 2014, **5**, 5017.
32. Z. Yuan, H.-J. Peng, T.-Z. Hou, J.-Q. Huang, C.-M. Chen, D.-W. Wang, X.-B. Cheng, F. Wei and Q. Zhang, *Nano Lett.*, 2016, **16**, 519-527.
33. H. Xu and A. Manthiram, *Nano Energy*, 2017, **33**, 124-129.
34. Q. Pang, D. Kundu and L. F. Nazar, *Mater. Horiz.*, 2016, **3**, 130-136.
35. T. Lei, W. Chen, J. Huang, C. Yan, H. Sun, C. Wang, W. Zhang, Y. Li and J. Xiong, *Adv. Energy Mater.*, 2017, **7**, 1601843-n/a.
36. X. Liang, A. Garsuch and L. F. Nazar, *Angew. Chem. Int. Ed.*, 2015, **54**, 3907-3911.
